# Supplementary material
Source: publisher site journal article supplement (https://www.dovepress.com/article/406894)
Supplement: Supplementary file 1 [file get_supplementary_file.php]

Supplementary Table 1. Quotes from study participants about their feelings about gene therapy.

| N=25 | N (%) | Quote |
| --- | --- | --- |
| Worried or scared | 1 (4) | To me, a person is supposed to be born a certain way, go through life and its experiences, good or bad. And taking away hemophilia, that would totally change what kind of person I am and the way I look at the world. I'm so much more empathetic to people just because of my hemophilia. You know what I mean? I think people need to have their experiences, and some people get dealt cards where their life hurts, and you just keep moving. |
| No strong feelings | 2 (8) | Oh, okay. My expectations. Well, I think that it may-- well, in theory it sounds like it would be the ultimate form of treatment. And we may now come to live closer to normal lives. I don't expect though that my life from then on would match someone else's life who has never been affected, because we are-- but we are affected in other ways. There's still the joint damage that I don't think the gene therapy is going to undo that. I think that gene therapy would just eliminate the bleeds. But if someone is in a wheelchair because of hemophilia, because of a joint that is completely useless, then I don't think gene therapy would fix that. But it would prevent any further deterioration in one's quality of life. |
| Hopeful | 12 (48) | I'm hopeful not for myself but for the kids that are now growing up that it will prove to be both effective and affordable. |
| Excited | 10 (40) | Because it could actually make me free from anything related to health insurance or having to be a special case when I go to the dentist or any physician. And it will simplify a lot of things if we can cure this thing once and for all. |

Supplementary Table 2. Participants’ quotes about information needs and expectations related to gene therapy efficacy.

|  | Information need | Expectation |
| --- | --- | --- |
| Efficacy/effectiveness | I do very much value data. So the information that I want is down to a level where it's like, "This is the efficacy. This is the percentage of people who respond well to it." I like facts and numbers, not, "Oh, we think it's going to work like this." | So again, my primary consideration is just having the high levels of efficacy and coverage. So I just want to know that when I take a product, I essentially can complete that infusion and don't really necessarily have to consider hemophilia in my day-to-day activities, and I can go about doing activities as I would knowing that I have that coverage, so having the confidence in that efficacy. |
| Subthemes |  |  |
| Factor level | Or if it's like the gene therapy, maybe even what's been their experience in their factor levels. | Yeah. I think I wouldn't even consider switching over to gene therapy unless I knew that it could, for a number of years, at least, push or elevate your factor levels even out of the mild range, so even, say, over 50%. So, unless I knew that that's to be expected, I don't think it would be very attractive to me. |
| Effect on bleeds | What was the annual bleeding rate for these participants before the study, and what was the same number after the study?  Does it reduce my rate of bleeding? | I have this pretty high expectation now of maybe having to deal with hemophilia if I have an injury or a surgery that's pretty significant, but maybe not really having any bleeds other than that. I mean, kind of-- so yeah, close to or at zero bleeds would be my expectation. |
| Effect on joint health | How will it improve my joint health? That's important, because over time I've noticed some deterioration in my left ankle. It's not as flexible as my other ankle. And sometimes also in the morning it can be very stiff, so some mornings it can be a little bit tough to get around, but I do overcome it. Yeah. | I would not have target-joint issues. I would not have muscle bleeds. That would be my expectation. And I know that may be a little unrealistic. But if you're selling me a product that says I should have one bleed a year, and I used to have 40 on a product that I loved, then, yeah, what more can I say. I'll do it. I'll go onto gene therapy, but it better be good. |
| Impact on health-related quality of life | I would like to talk to people who have been through it. I would like to know what the changes have been with their lives. And I'm not expecting miracle changes to my life. I realize that, like I said, my joints have already been trashed. If you snapped your fingers and eliminated hemophilia from my life, my joints would still be trashed. | Because it could actually make me free from anything related to health insurance or having to be a special case when I go to the dentist or any physician. And it will simplify a lot of things if we can cure this thing once and for all.  I would be able to be a normal person who goes and works out and doesn't get injured every time I work out. That would be my expectation in that I could do that pain free. |
| Duration of effect | Well, I think I would like to know how long it lasts. I have the vague impression that it's supposed to last forever, but if it doesn't last forever, how long does it last exactly? | Well, I mean, in terms of for me, if I was going to ultimately choose gene therapy, then, again, I have kind of that criteria that it would need to work for a long time. Unless there's some vehicle to re-up on gene therapy, like do a future dose or something to make it work again-- I mean, I would want whatever the situation is for gene therapy to be the future for me. If I was going to make the switch, I would want gene therapy to kind of last forever. |
| Variability of effect | I would want to know what the variance is between different patients and how they respond to the medication. |  |

Supplementary Table 3. Participants’ quotes about information needs related to gene therapy safety.

| Subthemes | Information need |
| --- | --- |
| Liver toxicity | Liver effects or the process of kind of going through immunocompromisation. Some of those elements of it, I mean, I'm concerned about if those are totally reversible or if there's any long-term effect from that.  If, in the long run, people have kind of long-term effects that they have to deal with, liver issues, immune issues, immunity issues or otherwise that they're having to deal with, I mean, that would probably scare me away from it. If it seemed like people really had diminished efficacy, like if people started to have kind of more bleeds and kind of lost their clotting level over time, I mean, then that would probably make me less likely to want to do that. Yeah. I mean, things like that would be definitely things that would scare me away. |
| Immunogenicity | I would consider maybe safety concerns, ineligibility to try other competitive-- for first generation, if trying and using first-generation gene therapy, which maybe is 50% effective, disqualifies me from using 75% or 100% gene therapy, that's second or third generation, that would dissuade me. |
| Inhibitor | I mean, developing inhibitors or anything like that. |
| Cancer | And the one thing that worries me the most is the potential for some kind of cancer. I read a few things. I don't know how accurate it is. I know the technology keeps evolving and improving. But if there's any potential to develop some kind of cancer because of the gene therapy, it will make me hesitate. |
| Gene integration | does interact with your genetic code. I think that the kind of unknown, what will it do over time if it's changing code or providing instructions to your code, so that's a little -- I just need to learn more about that.  I'd be looking for the side effects. Because if they're altering your genes somewhat, there's bound to be side effects somehow, whether that's going to be giving you stomach issues, or you're going to have a second head growing out of your shoulder. I just don't what possible side effects are. And with the amount of medications I take orally and through the veins and stuff, I have enough side effects. So introducing any kind of additional side effect, I would frown upon that. |
| Unknowns | I'd like to find out if there are unknown side effects  So I feel like the gain of maybe not having to infuse but then maybe being worried about some other deleterious unknown side effects with regards to the genetic cure, we'll call it, that would add a layer of stress, but I don't know, maybe not stress, but doubt or worry at least until it's more established. |
| Long-term effects | Any secondary effects from using this particular therapy? What are the potential implications in the future? |
| Need for longer term-data | Probably just more long-- I mean, it'll just take time because I want to see if it seems safe for people for a long time. I mean, I want to see if people's kind of liver function and health kind of goes back to normal and is healthy over a long period of time. Do they continue to have those really high clotting factor levels over a long period of time, or does it diminish? I mean, yeah. I mean, I think I want to see probably several years to many years' worth of data before I think that that would be something I would strongly consider for myself.  And I want to understand their science as much as possible, because probably the thing that worries me the most about gene therapy is not the effect today or one year now, but the effect in 20 years. How can you tell this is going to be fine 20 years from now if you haven't tested me for 20 years? So I want to know everything about it. |
| Risk: benefit | But before I put myself at risk, I want to be certain that benefits outweigh risks.  It changes with age. So transitioning to extended half-life products. What was I thinking then? I was thinking, "I've got to have longer, more dependable protection against bleeds because I'm destroying my body, and I'd like to slow that degenerative curve." And now, what would I think about? I think with something like gene therapy, for example, there-- I'm 68 years old, so even in my own head, I feel like there's only so much benefit that I will gain from it in the closing decade or decades of my life. I would think about the cost, the risks, and because the benefit is diminished from where it would have been 20 years ago-- |

Supplementary Table 4. Participants’ quotes about key gene therapy attributes.

| Subthemes | Information need |
| --- | --- |
| Eligibility | Do I qualify?  And also whether or not you yourself are eligible, it may be good also to know your standing with other people, that, "Okay. What do you have in common with these others in your group, and how are you different from the others in the other group? |
| How it works | I would like to learn more scientifically about what the process is, the delivery mechanism, the vectors.  To learn the science about it and how it works in the body.  But which virus would you use? How is it attached specifically? The whole mechanism. I like to know-- I'd like to know the specifics of the transfer, the mechanism, the gene, and then any other possible things that a geneticist could possibly think of that could be a concern and that I don't know about, but maybe they would say, "Yeah, by doing this, it could have this effect on another gene." I don't know. I don't know for sure if I'm even on the right track with that thinking, but that's where I'm at. So that's why if I did have-- if I was considering it, I would want to have a discussion with somebody who really understood the genetics of it, and the process. |
| How it is given | What's involved, what is the procedure |
| Cost | Well, if it were available, I think that anyone would also need to know the economics of it. And how will this get paid for? What's it going to cost me?  but I'm worrying that it's going to cost a lot. And not everybody, especially the people who needs it the most, are going to have access to it. And I'm not naive in thinking that, "Oh, this is going to be like the COVID vaccine, that it's free and everybody can take it and problem solved." This is probably going to cost a lot of money. Not every insurance plan is going to cover it, and it's going to be probably-- the financial part of it is probably going to be more complicated than the scientific part of it. That's my expectation. Yeah, we're going to get to a solution, but it's not going to be available to everybody.  Will my insurance pay for it twice? Will they pay for another one if that one doesn't work? I'm curious. And the workup to make sure before they infuse you. |
| Data and Statistics | Well, I would like to know numbers. Numbers from studies with real participants.  I do want to see the data behind the clinical trial studies that led to the approval.  I want to know it all. I want to know what's been published about it online so I can go read that. I want to know what the results of the studies are. Oftentimes, it's very difficult to find that information, and that is not good. I think that it's up to you guys as NHF to make sure that information is available to the community and available to people who are considering this. That's one of the primary, I think, responsibilities of an organization like NHF or HFA or even the local chapters. |
| Trust in data/source | I don't want that to be hidden from me. I want that always to be available so I can really find out everything, whether it's good or bad.  I have to know where the source is to know how reliable it is.  And I kind of like to see that the information is coming from public spaces as opposed to one source of information. Again, it gets back to that multiple sources, multiple trusted sources mentality. You want to hear it coming from different sources all saying the same basic thing, and different sources that are reliable, don't have any vested financial or other interest in these treatments. |
| Patient Testimonial | I would like to hear if any of my friends or in the community have had any experiences with it.  When it comes straight from the horse's mouth. So if there's a patient that's been in a clinical study, I'd like to hear from them even if it's anecdotes, just sharing what their experience was. |
| How long studied and in how many people | I want to know if it's been approved, how long it's been approved, how widely it's been adopted.  And I want to know how many people have participated in the study, and how did it work for them? |
| Comparison to other treatments | So with something like going to gene therapy, I would just want to see if that could be more effective than what I'm currently doing and easier to take.  I would discuss it. I would definitely think about it. It would have to be pretty damn good to beat Hemlibra. I would say that. Yeah, it would have to be really something another level up to get me to switch off of Hemlibra. But as we talked about before, if I get a sense that it is the right thing, I wouldn't hesitate to switch if I believed in it and I thought it was going to work.  Well, the only way I would really consider it is if it was better than what I'm getting right now. If there were some-- I'm just throwing things out. If there were some demonstrable risk that they found with Hemlibra on a long-term basis, and they found that gene therapy didn't have that risk, or any risks, and it still reduced the amount of bleeds to the same level that I've had, which in my case has been none. So if you could meet those specs, then I would consider it. But it's kind of why would I change at this point unless it was markedly better, and how much better can you get if I haven't had a bleed in two years? You know what I mean? In my mind, why would I want to switch? I'm not opposed to it, if it's really good. But I already have something that works really, really well. So I'd really have to get more details about it. I would definitely consider it. I've heard a lot about it, and I'm intrigued by the whole possibility of it. But I would have to really discuss things. |
| Cost/insurance | But I'm worrying that it's going to cost a lot. And not everybody, especially the people who needs it the most, are going to have access to it. And I'm not naive in thinking that, "Oh, this is going to be like the COVID vaccine, that it's free and everybody can take it and problem solved." This is probably going to cost a lot of money. Not every insurance plan is going to cover it, and it's going to be probably-- the financial part of it is probably going to be more complicated than the scientific part of it. That's my expectation. Yeah, we're going to get to a solution, but it's not going to be available to everybody.  Well, I guess depending on the person, I would think having - what do you call it? - I guess, the price or-- I don't want to say price. But is it going to be affordable to that family or that person, I think, would be-- maybe some kind of info on how's it going to be paid for or insurance. Because not everybody has insurance, and not everybody can afford certain treatments. So I think that might, depending on that person-- obviously, if they have insurance, a good job, etc., it might not be that important. But if you're directing it at somebody else who is not there or doesn't have those, then they're probably going to be thinking, "Can I afford it?"  Will my insurance pay for it twice? Will they pay for another one if that one doesn't work? I'm curious. And the workup to make sure before they infuse you. |
